# Supplementary material for: Drug target identification using network analysis: Taking active components in Sini decoction as an example
Source: PubMed Central journal article supplement (PMC4837341; doi:10.1038/srep24245), 2016-04-20
Supplement: srep24245-s1.pdf [file srep24245-s1.pdf]

## Supplementary Information

### Drug target identification using network analysis: Taking active components in *Sini* decoction as an example

Si Chen<sup>1</sup>, Hailong Jiang<sup>1</sup>, Yan Cao<sup>1</sup>, Yun Wang<sup>1</sup>, Ziheng Hu<sup>2</sup>,

Zhenyu Zhu<sup>1,\*</sup> & Yifeng Chai<sup>1,\*</sup>

1 School of Pharmacy, Second Military Medical University, 325 Guohe Road, Shanghai, 200433, China

\* Correspondence and requests for materials should be addressed to Z.Z. (email: zzyzyfzhu@163.com) or Y.C. (email: [yfchai@smmu.edu.cn](mailto:yfchai@smmu.edu.cn))

#### Supplementary Table S1. Metabolism of components in SND retrieving from admetSAR<sup>3</sup>.

| No. | Compounds              | CYP450 1A2 | CYP450 2C9 | CYP450 2D6 | CYP450 2C19 | CYP450 3A4 |
|-----|------------------------|------------|------------|------------|-------------|------------|
|     |                        | inhibitor  | inhibitor  | inhibitor  | inhibitor   | inhibitor  |
| S3  | Mesaconine             | No         | No         | No         | No          | No         |
| S4  | Senbusine A            | No         | No         | No         | No          | No         |
| S5  | Senbusine B            | No         | No         | No         | No          | No         |
| S6  | Talatizidine           | No         | No         | No         | No          | No         |
| S7  | Aconine                | No         | No         | No         | No          | No         |
| S8  | Hypaconine             | No         | No         | No         | No          | No         |
| S9  | Fuziline               | No         | No         | No         | No          | No         |
| S10 | Neoline                | No         | No         | No         | No          | No         |
| S11 | Bikhaconine            | No         | No         | No         | No          | No         |
| S12 | Talatisamine           | No         | No         | No         | No          | No         |
| S13 | 14-O-acetyl<br>neoline | No         | No         | No         | No          | No         |
| S15 | Benzoylmes<br>aconine  | No         | No         | No         | No          | No         |
| S16 | Benzoylaco             | No         | No         | No         | No          | No         |

---

|            |                                                                          |             |             |              |              |              |
|------------|--------------------------------------------------------------------------|-------------|-------------|--------------|--------------|--------------|
|            | nine                                                                     |             |             |              |              |              |
| <b>S18</b> | Jesaconitine                                                             | No          | No          | No           | No           | No           |
| <b>S19</b> | Beiwutine                                                                | No          | No          | No           | No           | No           |
| <b>S21</b> | Mesaconitin                                                              | No          | No          | No           | No           | No           |
|            | e                                                                        |             |             |              |              |              |
| <b>S22</b> | Aconifine                                                                | No          | No          | No           | No           | No           |
| <b>S30</b> | Crassicaulin                                                             | No          | No          | No           | No           | No           |
|            | e A                                                                      |             |             |              |              |              |
| <b>S31</b> | Salsolinol                                                               | No          | pAC50=4.8nM | No           | No           | No           |
| <b>S32</b> | Coryneine                                                                | No          | No          | No           | No           | No           |
| <b>S33</b> | Chuanfumin                                                               | No          | No          | No           | No           | No           |
|            | e                                                                        |             |             |              |              |              |
| <b>S34</b> | Karakanine                                                               | No          | No          | No           | No           | No           |
| <b>Z14</b> | 24-Hydroxy                                                               | No          | No          | No           | No           | pAC50=5nM    |
|            | glycyrrhetic                                                             |             |             |              |              |              |
|            | acid                                                                     |             |             |              |              |              |
| <b>Z25</b> | Methyl 3b,<br>24-dihydroxy<br>y<br>olean-11,13(<br>18)-diene<br>30-O ate | No          | No          | No           | No           | No           |
| <b>Z27</b> | Betulic acid                                                             | No          | No          | No           | No           | No           |
| <b>Z28</b> | Uralenolide                                                              | No          | No          | No           | No           | pAC50=5.4nM  |
| <b>H27</b> | Licochalcon                                                              | pAC50=7.2n  | No          | No           | pAC50=6.1nM  | No           |
|            | e B                                                                      | M           |             |              |              |              |
| <b>H28</b> | Echinatin                                                                | pAC50=7.2n  | No          | No           | pAC50=6.1nM  | No           |
|            | M                                                                        |             |             |              |              |              |
| <b>H29</b> | Isoliquiritige                                                           | pAC50=5.3n  | pAC50=4.7nM | pAC50=4.8nM  | pAC50=4.9nM  | pAC50=5.5nM  |
|            | nin                                                                      | M           |             |              |              |              |
| <b>H31</b> | Glepidotin                                                               | pAC50=5.45n | pAC50=5.6nM | pAC50=4.85nM | pAC50=5.55nM | pAC50=5.85nM |

---

## Reference

- 1 Cheng, F. *et al.* admetSAR: a comprehensive source and free tool for assessment of chemical ADMET properties. *J Chem Inf Model* **52**, 3099-3105, doi:10.1021/ci300367a (2012).

### Supplementary Table S2. Results of the physiochemical characteristics similarity between 196 components in herbs in SND and 105 FDA-approved oral drugs from drugbank.

| Variables                                    | Mean       |            | Wilcoxon test                        | Kolmogorov-Smirnov test              |
|----------------------------------------------|------------|------------|--------------------------------------|--------------------------------------|
|                                              | drug       | herb       | Significance (2-tailed) <sup>a</sup> | Significance (2-tailed) <sup>a</sup> |
| <b>ALogP</b>                                 | 2.48556    | 3.03900    | 0.034                                | 0.006                                |
| <b>Molecular Weight</b>                      | 335.153013 | 425.179603 | 0.000                                | 0.000                                |
| <b>Num_H_Acceptors</b>                       | 4.12       | 6.60       | 0.000                                | 0.000                                |
| <b>Num_H_Donors</b>                          | 1.73       | 2.82       | 0.000                                | 0.006                                |
| <b>Num-Rotatable Bonds</b>                   | 5.97       | 7.32       | 0.003                                | 0.020                                |
| <b>Num_AromaticRings</b>                     | 1.54       | 1.08       | 0.005                                | 0.025                                |
| <b>Molecular_Fractional/PolarSurfaceArea</b> | 0.22856    | 0.23206    | 0.095                                | 0.001                                |

<sup>a</sup>The significance level is 0.05.

### Supplementary Table S3. Targets of active components in SND validated by references.

| Gene symbol | Target name                                      | Serial number | Name         | Reference | Activity                     |
|-------------|--------------------------------------------------|---------------|--------------|-----------|------------------------------|
| ESR2        | Estrogen receptor beta                           | <b>H60</b>    | Daidzein     | 1         | Ki=300 nM                    |
| ESR1        | Estrogen receptor alpha                          | <b>H60</b>    | Daidzein     | 1         | Ki=1800 nM                   |
| XDH         | Xanthine dehydrogenase                           | <b>H60</b>    | Daidzein     | 2         | IC <sub>50</sub> =429800nM   |
| PPARG       | Peroxisome proliferator-activated receptor gamma | <b>H60</b>    | Daidzein     | 3         | Fold activation=1.2          |
| ESR2        | Estrogen receptor beta                           | <b>H56</b>    | Davidigenin  | 4         | IC <sub>50</sub> =1000000 nM |
| ESR1        | Estrogen receptor alpha                          | <b>H56</b>    | Davidigenin  | 4         | IC <sub>50</sub> =1000000 nM |
| PPARG       | Peroxisome proliferator-activated receptor gamma | <b>H28</b>    | echinatin    | 5         | Activity                     |
| PPARG       | Peroxisome                                       | <b>H34</b>    | formononetin | 3         | Fold activation=             |

|            |                                                        |            |                       |    |                                   |
|------------|--------------------------------------------------------|------------|-----------------------|----|-----------------------------------|
|            | proliferator-activated<br>receptor gamma               |            |                       |    | 4.6                               |
| XDH        | Xanthine<br>dehydrogenase                              | <b>H34</b> | formononetin          | 6  | Inhibition=<br>17.6%              |
| PPARG      | Peroxisome<br>proliferator-activated<br>receptor gamma | <b>H41</b> | Gancaonin<br>L        | 5  | Activity                          |
| PPARG      | Peroxisome<br>proliferator-activated<br>receptor gamma | <b>Z29</b> | Glycyrrhetic<br>acid  | 7  | Activity                          |
| PPARG      | Peroxisome<br>proliferator-activated<br>receptor gamma | <b>H29</b> | Isoliquiritigen<br>in | 3  | Fold activation=<br>1.3           |
| XDH        | Xanthine<br>dehydrogenase                              | <b>H20</b> | Liquiritigenin        | 6  | IC <sub>50</sub> =<br>11300 nM    |
| ESR1       | Estrogen receptor<br>alpha                             | <b>H10</b> | rutin                 | 8  | Activity=107.97<br>%              |
| XDH        | Xanthine<br>dehydrogenase                              | <b>H10</b> | rutin                 | 9  | IC <sub>50</sub> =<br>52200 nM    |
| PPARG      | Peroxisome<br>proliferator-activated<br>receptor gamma | <b>H10</b> | rutin                 | 10 | Activity                          |
| ADRA2<br>A | Alpha-2A adrenergic<br>receptor                        | <b>H10</b> | rutin                 | 11 | Ki=9340<br>nM                     |
| ESR1       | Estrogen receptor<br>alpha                             | <b>H11</b> | quercetin             | 8  | Activity=76.81<br>%               |
| HIF1A      | Hypoxia-inducible<br>factor 1-alpha                    | <b>H11</b> | quercetin             | 12 | IC <sub>50</sub> =<br>10200nM     |
| PPARG      | Peroxisome<br>proliferator-activated<br>receptor gamma | <b>H11</b> | quercetin             | 3  | Fold activation=<br>1.3           |
| CA2        | Carbonic anhydrase<br>II                               | <b>H11</b> | quercetin             | 13 | Ki=<br>2540nM                     |
| XDH        | Xanthine<br>dehydrogenase                              | <b>H11</b> | quercetin             | 14 | Fold<br>activation=170            |
| PON1       | Serum<br>paraoxonase/arylester<br>ase 1                | <b>H11</b> | quercetin             | 15 | Activity                          |
| CDK2       | Cyclin-dependent<br>kinase 2                           | <b>H11</b> | quercetin             | 16 | IC <sub>50</sub> =<br>40000nM     |
| ADRB2      | Beta-2 adrenergic<br>receptor                          | <b>S39</b> | higenamine            | 17 | EC <sub>50</sub> =<br>126.5 ng/mL |
| HMOX1      | Heme oxygenase 1                                       | <b>S39</b> | higenamine            | 18 | Activity                          |
| NOS2       | Nitric Oxide                                           | <b>S39</b> | higenamine            | 19 | IC <sub>50</sub> =                |

|       |                                                             |            |                               |               |                                |
|-------|-------------------------------------------------------------|------------|-------------------------------|---------------|--------------------------------|
| NOS2  | Synthase 2, Inducible<br>Nitric Oxide Synthase 2, Inducible | <b>J13</b> | 1-Dehydro-<br>[6]-gingerdione | <sup>20</sup> | 53µM<br>Activity               |
| AGTR1 | Angiotensin Receptor, Type 1                                | <b>J54</b> | 6-Gingerol                    | <sup>21</sup> | IC <sub>50</sub> =<br>8.173 µM |
| ESR2  | Estrogen receptor beta                                      | <b>H20</b> | liquiritigenin                | <sup>22</sup> | EC <sub>50</sub> =<br>36.5 nM  |

## Reference

- Matsuda, H., Shimoda, H., Morikawa, T. & Yoshikawa, M. Phytoestrogens from the roots of *Polygonum cuspidatum* (Polygonaceae): structure-requirement of hydroxyanthraquinones for estrogenic activity. *Bioorg Med Chem Lett* **11**, 1839-1842 (2001).
- Park, J. S., Park, H. Y., Kim, D. H., Kim, D. H. & Kim, H. K. ortho-dihydroxyisoflavone derivatives from aged Doenjang (Korean fermented soypaste) and its radical scavenging activity. *Bioorg Med Chem Lett* **18**, 5006-5009 (2008).
- Matin, A. *et al.* 7-Hydroxy-benzopyran-4-one derivatives: a novel pharmacophore of peroxisome proliferator-activated receptor alpha and -gamma (PPARalpha and gamma) dual agonists. *J Med Chem* **52**, 6835-6850 (2009).
- Zhao, L. & Brinton, R. D. Structure-based virtual screening for plant-based ERbeta-selective ligands as potential preventative therapy against age-related neurodegenerative diseases. *J Med Chem* **48**, 3463-3466 (2005).
- Kuroda, M. *et al.* Phenolics from *Glycyrrhiza glabra* roots and their PPAR-gamma ligand-binding activity. *Bioorg Med Chem* **18**, 962-970 (2010).
- Hayashi, T. *et al.* Inhibition of cow's milk xanthine oxidase by flavonoids. *J Nat Prod* **51**, 345-348 (1988).
- Lallemand, B. *et al.* N-(2-{3-[3,5-bis(trifluoromethyl)phenyl]ureido}ethyl)-glycyrrhetinamide (6b): a novel anticancer glycyrrhetic acid derivative that targets the proteasome and displays anti-kinase activity. *J Med Chem* **54**, 6501-6513 (2011).
- Liu, L. *et al.* Discovery of estrogen receptor alpha modulators from natural compounds in Si-Wu-Tang series decoctions using estrogen-responsive MCF-7 breast cancer cells. *Bioorg Med Chem Lett* **22**, 154-163 (2012).
- Cos, P. *et al.* Structure-activity relationship and classification of flavonoids as inhibitors of xanthine oxidase and superoxide scavengers. *J Nat Prod* **61**, 71-76 (1998).
- Ha do, T. *et al.* The selected flavonol glycoside derived from *Sophorae Flos* improves glucose uptake and inhibits adipocyte differentiation via activation AMPK in 3T3-L1 cells. *Bioorg Med Chem Lett* **20**, 6076-6081 (2010).
- Nahrstedt, A. & Butterweck, V. Lessons learned from herbal medicinal products: the example of St. John's Wort (perpendicular). *J Nat Prod* **73**, 1015-1021 (2010).
- Ko, S., Lee, M. K., Shin, D. & Park, H. Structure-based virtual screening approach to the discovery of novel inhibitors of factor-inhibiting HIF-1: identification of new chelating groups for the active-site ferrous ion. *Bioorg Med Chem* **17**, 7769-7774 (2009).
- Innocenti, A., Beyza Ozturk Sarikaya, S., Gulcin, I. & Supuran, C. T. Carbonic anhydrase inhibitors. Inhibition of mammalian isoforms I-XIV with a series of natural product

- polyphenols and phenolic acids. *Bioorg Med Chem* **18**, 2159-2164 (2010).
- 14 Pauff, J. M. & Hille, R. Inhibition studies of bovine xanthine oxidase by luteolin, silibinin, quercetin, and curcumin. *J Nat Prod* **72**, 725-731 (2009).
- 15 Atrahimovich, D., Vaya, J. & Khatib, S. The effects and mechanism of flavonoid-rePON1 interactions. Structure-activity relationship study. *Bioorg Med Chem* **21**, 3348-3355 (2013).
- 16 Lee, J., Park, T., Jeong, S., Kim, K. H. & Hong, C. 3-Hydroxychromones as cyclin-dependent kinase inhibitors: synthesis and biological evaluation. *Bioorg Med Chem Lett* **17**, 1284-1287 (2007).
- 17 Bai, G. *et al.* Identification of higenamine in Radix Aconiti Lateralis Preparata as a beta2-adrenergic receptor agonist. *Acta Pharmacol Sin* **29**, 1187-1194 (2008).
- 18 Ha, Y. M. *et al.* Higenamine reduces HMGB1 during hypoxia-induced brain injury by induction of heme oxygenase-1 through PI3K/Akt/Nrf-2 signal pathways. *Apoptosis* **17**, 463-474 (2012).
- 19 Kang, Y. J. *et al.* Inhibition of activation of nuclear factor kappaB is responsible for inhibition of inducible nitric oxide synthase expression by higenamine, an active component of aconite root. *J Pharmacol Exp Ther* **291**, 314-320 (1999).
- 20 Li, F. *et al.* In vitro antioxidant and anti-inflammatory activities of 1-dehydro-[6]-gingerdione, 6-shogaol, 6-dehydroshogaol and hexahydrocurcumin. *Food Chem* **135**, 332-337 (2012).
- 21 Liu, Q. *et al.* [6]-gingerol: a novel AT(1) antagonist for the treatment of cardiovascular disease. *Planta Med* **79**, 322-326 (2013).
- 22 Mersereau, J. E. *et al.* Liquiritigenin is a plant-derived highly selective estrogen receptor beta agonist. *Mol Cell Endocrinol* **283**, 49-57 (2008).

**Supplementary Table S4. The significance of every relevant pathway of high degree (20-41), middle degree (10-19) and low degree (1-9) targets.**

| High Degree (20-41) pathway | p-value  | Middle degree (10-19) pathway           | p-value  | Low degree (1-9) pathway               | p-value  |
|-----------------------------|----------|-----------------------------------------|----------|----------------------------------------|----------|
| HIF-1 signaling pathway     | 1.95E-07 | Dilated cardiomyopathy                  | 6.46E-04 | HIF-1 signaling pathway                | 5.48E-08 |
| Calcium signaling pathway   | 9.49E-05 | TNF signaling pathway                   | 9.35E-04 | VEGF signaling pathway                 | 1.16E-07 |
| Insulin secretion           | 8.32E-04 | cGMP-PKG signaling pathway              | 2.03E-03 | Oxytocin signaling pathway             | 5.53E-07 |
| Oocyte meiosis              | 1.39E-03 | Calcium signaling pathway               | 2.49E-03 | cGMP-PKG signaling pathway             | 6.69E-07 |
| Tuberculosis                | 3.59E-03 | Neuroactive ligand-receptor interaction | 5.84E-03 | Calcium signaling pathway              | 1.22E-06 |
|                             |          |                                         |          | Adrenergic signaling in cardiomyocytes | 8.89E-06 |

**Supplementary Table S5. In vivo components in SND retrieving from our previous research<sup>1,2</sup>.**

| <b>NO</b> | <b>In vivo components</b>               | <b>Origins</b>         | <b>Formula</b> |
|-----------|-----------------------------------------|------------------------|----------------|
| 1         | Yunganoside K2                          | plasma<br>and<br>urine | C42H62O17      |
| 2         | Uralsaponin B                           | urine                  | C42H62O16      |
| 3         | Talatizamine                            | plasma<br>and<br>urine | C24H39NO5      |
| 4         | Songorine                               | plasma<br>and<br>urine | C22H31NO3      |
| 5         | Senbusine B                             | urine                  | C23H37NO6      |
| 6         | Senbusine A                             | plasma<br>and<br>urine | C23H37NO6      |
| 7         | Neoline                                 | plasma<br>and<br>urine | C24H39NO6      |
| 8         | Mesaconine                              | plasma<br>and<br>urine | C24H39NO9      |
| 9         | Liquiritin apioside                     | plasma<br>and<br>urine | C26H30O13      |
| 10        | Liquiritin                              | plasma<br>and<br>urine | C21H22O9       |
| 11        | Liquiritigenin-O-sulfate                | urine                  | C15H12O7S      |
| 12        | Liquiritigenin glucuronide              | plasma<br>and<br>urine | C21H21O10      |
| 13        | Liquiritigenin                          | plasma<br>and<br>urine | C15H12O4       |
| 14        | licoricesaponine H2/K2 or Uralsaponin B | plasma                 | C42H64O15      |
| 15        | Licoricesaponin A3                      | plasma                 | C48H72O21      |
| 16        | Licorice saponin J2                     | plasma                 | C42H64O16      |
| 17        | Licorice saponin G2                     | plasma<br>and<br>urine | C42H62O17      |
| 18        | Licorice saponin C2                     | plasma                 | C42H62O15      |
| 19        | Licorice saponin B2                     | plasma                 | C42H64O15      |
| 20        | Licorice saponin A3                     | urine                  | C48H72O21      |
| 21        | licoisoflavone B-O-sulfate              | urine                  | C20H16O9S      |
| 22        | Licoisoflavone B                        | urine                  | C20H16O6       |
| 23        | Licoisoflavone                          | urine                  | C20H18O6       |
| 24        | Licochalcone D-O-glucuronide            | urine                  | C27H30O11      |
| 25        | Licochalcone D                          | urine                  | C21H22O5       |
| 26        | Licobenzofuran-O-glucuronide            | urine                  | C27H30O11      |
| 27        | Licobenzofuran                          | urine                  | C21H22O5       |
| 28        | Karakoline                              | urine                  | C22H35NO4      |
| 29        | Karakolidine                            | urine                  | C22H35NO5      |
| 30        | Isotalatizidine                         | plasma<br>and          | C23H37NO5      |

|    |                                       |        |     |            |
|----|---------------------------------------|--------|-----|------------|
|    |                                       | urine  |     |            |
| 31 | Isomer of licorice saponin B2         | plasma |     | C42H64O15  |
| 32 | Isoliquiritin apioside                | plasma | and | C26H30O13  |
|    |                                       | urine  |     |            |
| 33 | Isoliquiritin                         | plasma | and | C21H22O9   |
|    |                                       | urine  |     |            |
| 34 | Isoliquiritigenin-O-sulfate           | urine  |     | C15H12O7S  |
| 35 | Isoliquiritigenin glucuronide         | plasma | and | C21H21O10  |
|    |                                       | urine  |     |            |
| 36 | Isoliquiritigenin                     | plasma | and | C15H12O4   |
|    |                                       | urine  |     |            |
| 37 | Hypaconitine                          | urine  |     | C33H45NO10 |
| 38 | Hypaconine                            | urine  |     | C24H39NO8  |
| 39 | Hetisine                              | urine  |     | C20H27NO3  |
| 40 | Glyzaglabrin                          | urine  |     | C16H10O6   |
| 41 | Glycyrrhizin                          | plasma | and | C42H62O16  |
|    |                                       | urine  |     |            |
| 42 | Glycyrrhisoflvanone                   | urine  |     | C21H20O6   |
| 43 | Glycyrrhetic acid                     | plasma |     | C30H46O4   |
| 44 | Glycyroside                           | plasma |     | C27H30O13  |
| 45 | Glycycoumarin                         | urine  |     | C21H20O6   |
| 46 | Glucoliquiritin apioside              | plasma |     | C32H40O18  |
| 47 | Gancaonin N/Gancaonin B               | urine  |     | C21H20O6   |
| 48 | Gancaonin L                           | urine  |     | C20H18O6   |
| 49 | Gancaonin B/Gancaonin N               | urine  |     | C21H20O6   |
| 50 | Fuzitine                              | urine  |     | C20H24NO4  |
| 51 | Fuziline                              | plasma | and | C24H39NO7  |
|    |                                       | urine  |     |            |
| 52 | Foromonetin-O-sulfate                 | urine  |     | C16H12O7S  |
| 53 | Foromonetin-O-glucuronide             | urine  |     | C22H20O10  |
| 54 | Foromonetin monohydroxylate           | urine  |     | C16H12O5   |
| 55 | Foromonetin monohydroxylate           | urine  |     | C16H12O5   |
| 56 | Foromonetin monohydroxylate           | urine  |     | C16H12O5   |
| 57 | Foromonetin monohydroxylate           | urine  |     | C16H12O5   |
| 58 | Foromonetin monohydroxylate           | urine  |     | C16H12O5   |
| 59 | Formononetin glucuronide              | plasma |     | C22H20O10  |
| 60 | Formononetin                          | plasma | and | C16H12O4   |
|    |                                       | urine  |     |            |
| 61 | Dihydroformanonetin                   | urine  |     | C16H14O4   |
| 62 | Demethyl-8-methoxyl-14-benzoylaconine | urine  |     | C32H45NO10 |
| 63 | Demethyl-14-acetyltalatizamine        | urine  |     | C24H35NO7  |
| 64 | Demethyl-14-acetylkarakoline          | urine  |     | C23H35NO5  |
| 65 | Demethyl talatizamine                 | urine  |     | C23H37NO5  |
| 66 | Demethyl talatizamine                 | urine  |     | C23H37NO5  |



|     |                                     |                 |                |
|-----|-------------------------------------|-----------------|----------------|
| 67  | Demethyl senbusine B                | urine           | C22H35NO6      |
| 68  | Demethyl senbusine A                | urine           | C22H35NO6      |
| 69  | Demethyl neoline                    | urine           | C23H37NO6      |
| 70  | Demethyl neoline                    | urine           | C23H37NO6      |
| 71  | Demethyl karakolidine               | urine           | C21H33NO5      |
| 72  | Demethyl karakolidine               | urine           | C21H33NO5      |
| 73  | Demethyl isotalatizidine            | urine           | C22H35NO5      |
| 74  | Demethyl hypaconitine               | urine           | C32H43NO10     |
| 75  | Demethyl dehydrogen isotalatizidine | urine           | C22H33NO5      |
| 76  | Demethyl benzoylhypaconine          | urine           | C30H41NO9      |
| 77  | Demethyl benzoyldeoxyaconine        | urine           | C31H43NO9      |
| 78  | Demethyl benzoylaconine             | urine           | C31H43NO10     |
| 79  | Demethyl isotalatizidine            | urine           | C22H35NO5      |
| 80  | Dehydrogen karakolidine             | urine           | C22H33NO5      |
| 81  | Dehydrogen chuanfunine              | urine           | C22H33NO5      |
| 82  | Dehydrated benzoylmesaconine        | plasma<br>urine | and C31H41NO9  |
| 83  | Dehydrated benzoyhypaconine         | urine           | C31H41NO8      |
| 84  | Dehydrated 6-gingerol               | urine           | C17H24O3       |
| 85  | Davidigenin-O-sulfate               | urine           | C15H14O7S      |
| 86  | Davidigenin-O-sulfate               | urine           | C15H14O7S      |
| 87  | Davidigenin-O-sulfate               | urine           | C15H14O7S      |
| 88  | Davidigenin-O-sulfate               | urine           | C15H14O7S      |
| 89  | Davidigenin-O-glucuronide           | urine           | C21H22O10      |
| 90  | Davidigenin                         | urine           | C15H14O4       |
| 91  | Daidzein-O-sulfate                  | urine           | C15H10O7S      |
| 92  | Daidzein                            | urine           | C15H10O4       |
| 93  | Chuanfunine                         | plasma<br>urine | and C22H35NO5  |
| 94  | Benzoylmesaconine                   | plasma<br>urine | and C31H43NO10 |
| 95  | Benzoylhypaconine                   | plasma<br>urine | and C31H43NO9  |
| 96  | Benzoyldeoxyaconine                 | plasma<br>urine | and C32H45NO9  |
| 97  | Benzoylaconine                      | plasma<br>urine | and C32H45NO10 |
| 98  | Beiwudine                           | urine           | C31H41NO8      |
| 99  | Aconine                             | plasma<br>urine | and C25H41NO9  |
| 100 | 8-methoxyl-14-benzoylaconine        | urine           | C33H47NO10     |
| 101 | 6-Gingerol glucuronide              | plasma          | C23H34O10      |
| 102 | 6-Gingerol                          | urine           | C17H26O4       |
| 103 | 4',7-dihydroxyflavone               | urine           | C15H10O4       |

|            |                                    |                     |            |
|------------|------------------------------------|---------------------|------------|
| <b>104</b> | 16- $\beta$ -Hydroxycardiopetaline | urine               | C21H33NO4  |
| <b>105</b> | 14-benzoy-10-OH-mesaconine         | urine               | C31H43NO11 |
| <b>106</b> | 14-benzoy-10-OH-aconine            | urine               | C32H45NO11 |
| <b>107</b> | 14-acetyltalatizamine              | plasma and<br>urine | C26H41NO6  |
| <b>108</b> | 14-acetylneoline                   | urine               | C26H41NO7  |
| <b>109</b> | 14-acetylkarakoline                | urine               | C24H37NO5  |
| <b>110</b> | 10-OH-mesaconine                   | urine               | C24H39NO10 |
| <b>111</b> | 10-OH-aconine                      | urine               | C25H41NO10 |
| <b>112</b> | 10-Hydroxytalatizamine             | urine               | C24H39NO6  |

## Reference

- 1 Tan, G. *et al.* A strategy for rapid analysis of xenobiotic metabolome of Sini decoction in vivo using ultra-performance liquid chromatography-electrospray ionization quadrupole-time-of-flight mass spectrometry combined with pattern recognition approach. *J Pharm Biomed Anal* **96**, 187-196, doi:10.1016/j.jpba.2014.03.028 (2014).
- 2 Tan, G. *et al.* Analysis of phenolic and triterpenoid compounds in licorice and rat plasma by high-performance liquid chromatography diode-array detection, time-of-flight mass spectrometry and quadrupole ion trap mass spectrometry. *Rapid Commun Mass Spectrom* **24**, 209-218, doi:10.1002/rcm.4373 (2010).

## Supplementary Table S6. Quality control statistics on the performance of text mining for the term "heart failure"

| Database Name            | target proteins by searching | false positives | True proteins | target |
|--------------------------|------------------------------|-----------------|---------------|--------|
| <b>DrugBank database</b> | 4                            | 0               | 4             |        |
| <b>OMIM</b>              | 2                            | 1               | 1             |        |
| <b>UniProtKB</b>         | 114                          | 94              | 20            |        |
| <b>TTD</b>               | 28                           | 20              | 8             |        |
| <b>GeneCards</b>         | 72                           | 60              | 12            |        |

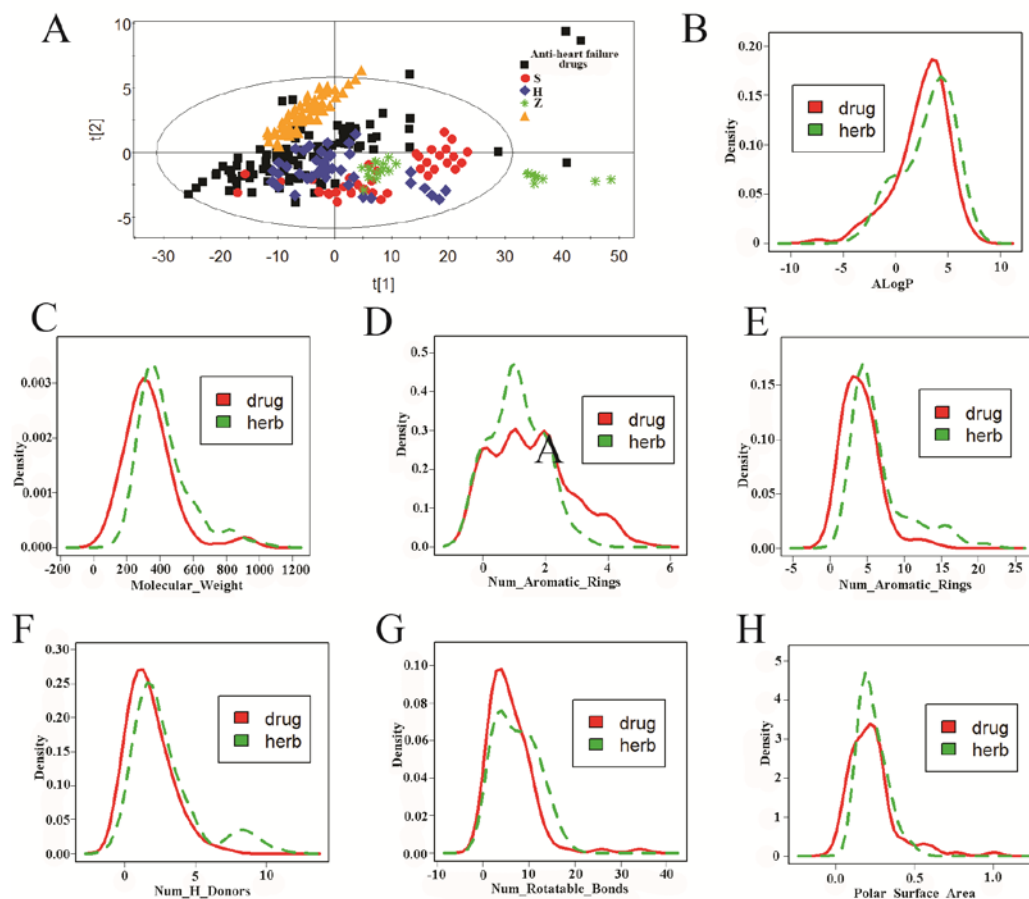

**Supplementary Figure 1.** Comparing chemical characteristics of active ingredients in SND. (A) PCA of active components in SND and approved anti-heart failure drugs calculated from seven chemical characteristics. Molecular weight; Num\_AromaticRings: the number of aromatic rings; Num\_H\_Donors: the number of hydrogen bond donors; Molecular\_FractionalPolarSurfaceArea: the molecular polar surface area; Num\_RotatableBonds: the number of rotatable bonds; ALogP: the octanol–water partition coefficient; Num\_H\_Acceptors: the number of hydrogen bond acceptors. S: *Aconitum carmichaelii*, G: *Glycyrrhiza uralensis*, J: *Zingiber officinale*. (B)–(H) are distributions of these seven chemical characteristics of ingredients in SND and approved oral drugs.

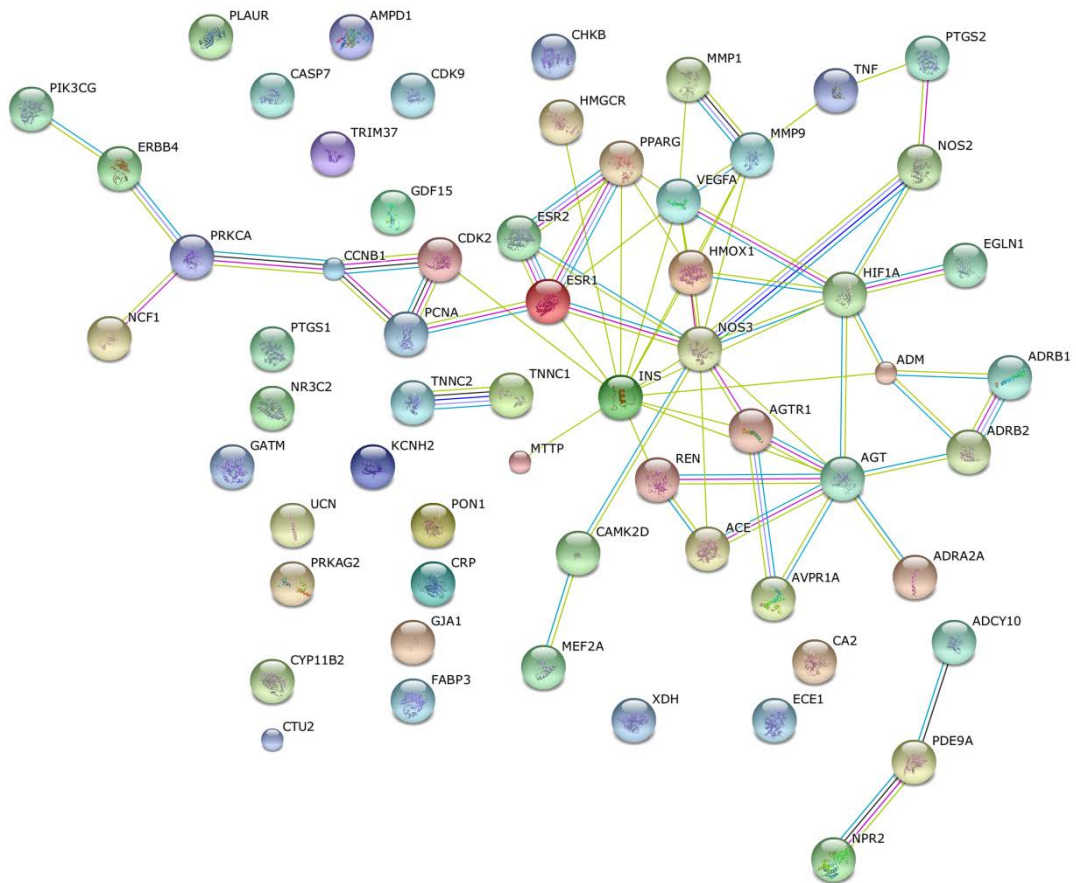

**Supplementary Figure 2.** Target protein-target protein interaction network
